# Supplementary material for: In situ synthesis of molybdenum carbide/N-doped carbon hybrids as an efficient hydrogen-evolution electrocatalyst
Source: Royal Society of Chemistry journal article supplement (doi:10.1039/c8ra02020e), 2018-01-01
Supplement: c8ra02020e1.pdf [file c8ra02020e1.pdf]

Supplementary data

**In-situ synthesis of molybdenum carbide/N-doped carbon hybrids as an efficient  
hydrogen-evolution electrocatalyst**

Jing Li,<sup>a</sup> Chenmin Zhou,<sup>a</sup> Jianshuai Mu,<sup>a</sup> En-Cui Yang<sup>\*a</sup> and Xiao-Jun Zhao<sup>\*a,b</sup>

<sup>a</sup> College of Chemistry, Key Laboratory of Inorganic-Organic Hybrid Functional Material Chemistry, Ministry of Education,  
Tianjin Key Laboratory of Structure and Performance for Functional Molecules, Tianjin Normal University, Tianjin 300387,  
P. R. China. E-mail: encui\_yang@163.com; xiaojun\_zhao15@163.com; Fax: +86-22-23766556

<sup>b</sup> Collaborative Innovation Center of Chemical Science and Engineering, Tianjin, 300071, China

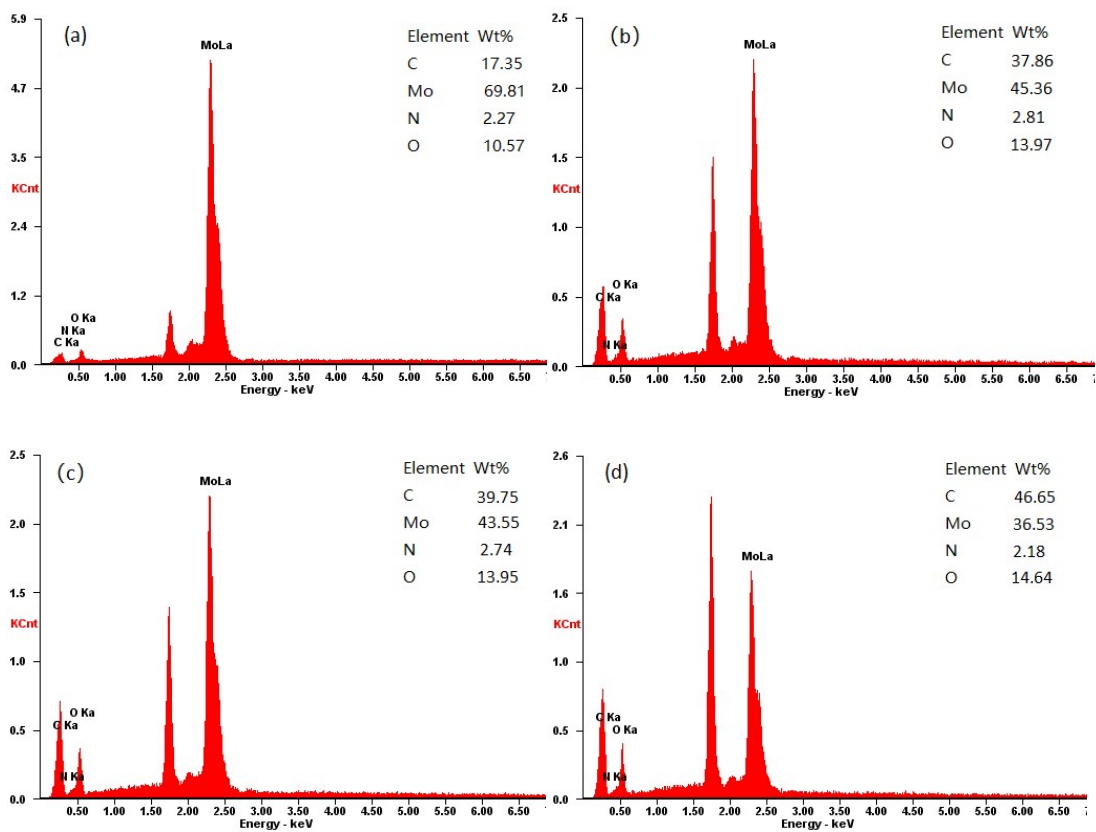

**Fig. S1** EDX spectra of  $\text{Mo}_2\text{C}@NC$  nanomaterials. (a)  $\text{Mo}_2\text{C}@NC-80$ , (b)  $\text{Mo}_2\text{C}@NC-160$ , (c)  $\text{Mo}_2\text{C}@NC-240$ , (d)  $\text{Mo}_2\text{C}@NC-320$ . The peaks at 1.74 and 2.01 keV were attributed to Si and P, as the  $\text{Mo}_2\text{C}@NC$  nanomaterials were measured on phosphorus-doped N-Type silicon plates.

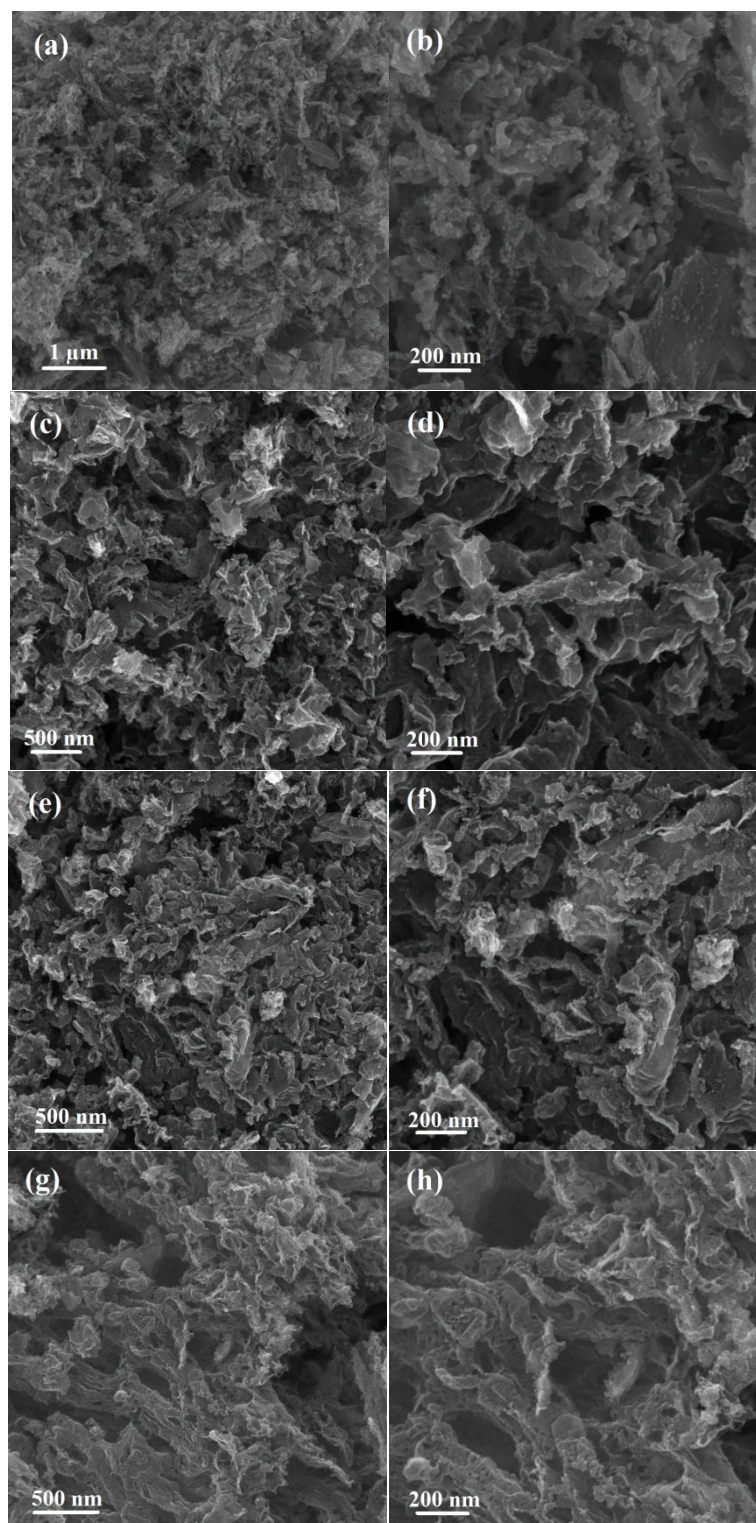

**Fig. S2** SEM images of Mo<sub>2</sub>C@NC nanomaterials. a and b: Mo<sub>2</sub>C@NC-80, c and d: Mo<sub>2</sub>C@NC-160, e and f: Mo<sub>2</sub>C@NC-240, g and h: Mo<sub>2</sub>C@NC-320.

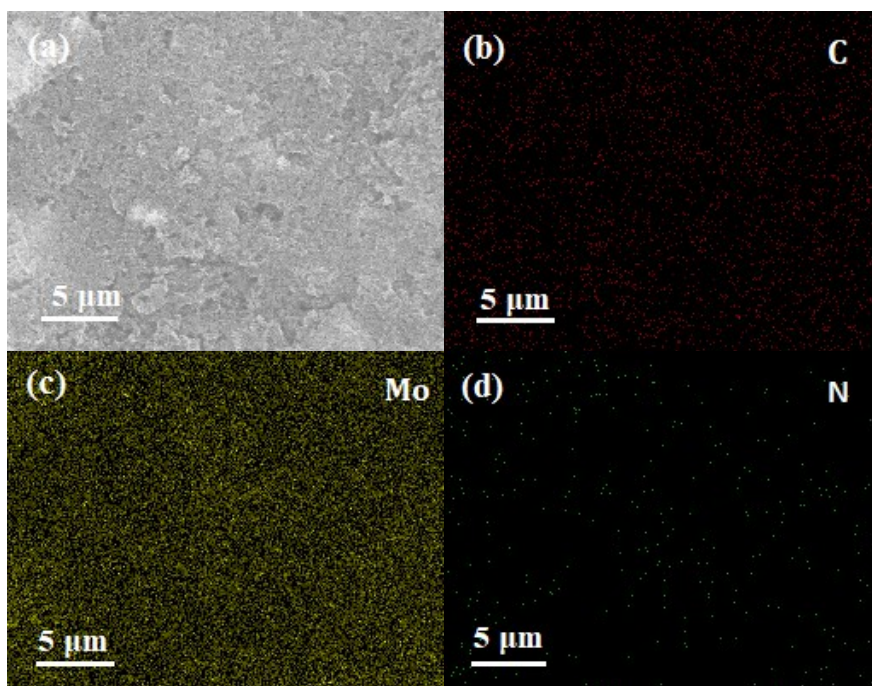

**Fig. S3** SEM image and corresponding C, Mo and N elemental mapping of Mo<sub>2</sub>C@NC-160.

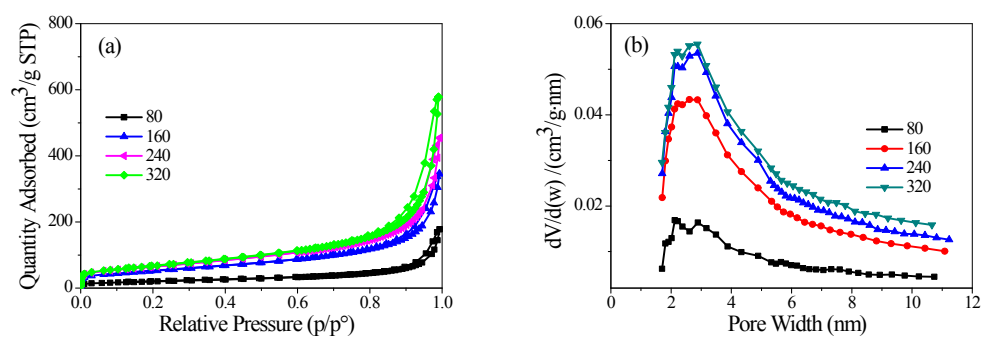

**Fig. S4** (a) N<sub>2</sub> adsorption-desorption isothermal curves and (b) pore distribution of Mo<sub>2</sub>C@NC nanomaterials.

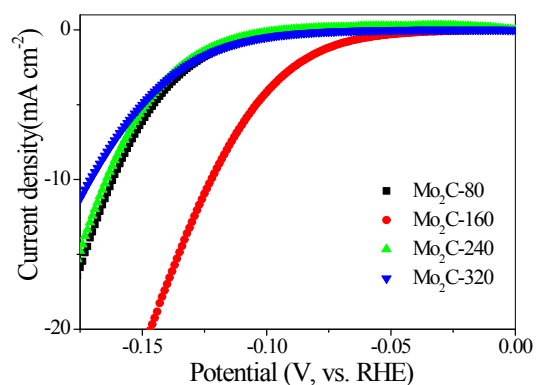

**Fig. S5** Polarization curves of different Mo<sub>2</sub>C@NC electrocatalysts without IR corrections. The HER activity of Mo<sub>2</sub>C without IR correction also followed the order: Mo<sub>2</sub>C@NC-160 > Mo<sub>2</sub>C@NC-80 > Mo<sub>2</sub>C@NC-240 > Mo<sub>2</sub>C@NC-320. And it needed overpotentials of 106, 140, 144 and 163 mV to reach a current density of 10 mA cm<sup>2</sup> for Mo<sub>2</sub>C@NC-160, Mo<sub>2</sub>C@NC-80, Mo<sub>2</sub>C@NC-240 and Mo<sub>2</sub>C@NC-320, respectively.

**Table S1** Summary of information for Mo<sub>2</sub>C@NC electrocatalysts.

| Samples                  | Free Carbon content (%) | BET Surface Area (m <sup>2</sup> /g) | $\eta_{10}$ (mA cm <sup>2</sup> ) | Tafel slope [mV/decade] | $j_0$ [10 <sup>-2</sup> mAcm <sup>2</sup> ] | TOF [10 <sup>-3</sup> s <sup>-1</sup> ] | R <sub>ct</sub> [ $\Omega$ ] |
|--------------------------|-------------------------|--------------------------------------|-----------------------------------|-------------------------|---------------------------------------------|-----------------------------------------|------------------------------|
| Mo <sub>2</sub> C@NC-80  | 3.7                     | 70.8                                 | 124                               | 45                      | 0.814                                       | 0.806                                   | 45.4                         |
| Mo <sub>2</sub> C@NC-160 | 28.1                    | 186.7                                | 90                                | 50                      | 7.65                                        | 11.7                                    | 28.5                         |
| Mo <sub>2</sub> C@NC-240 | 35.9                    | 230.9                                | 128                               | 55                      | 2.42                                        | 1.16                                    | 71.6                         |
| Mo <sub>2</sub> C@NC-320 | 41.3                    | 240.2                                | 147                               | 63                      | 2.74                                        | 0.555                                   | 90.1                         |

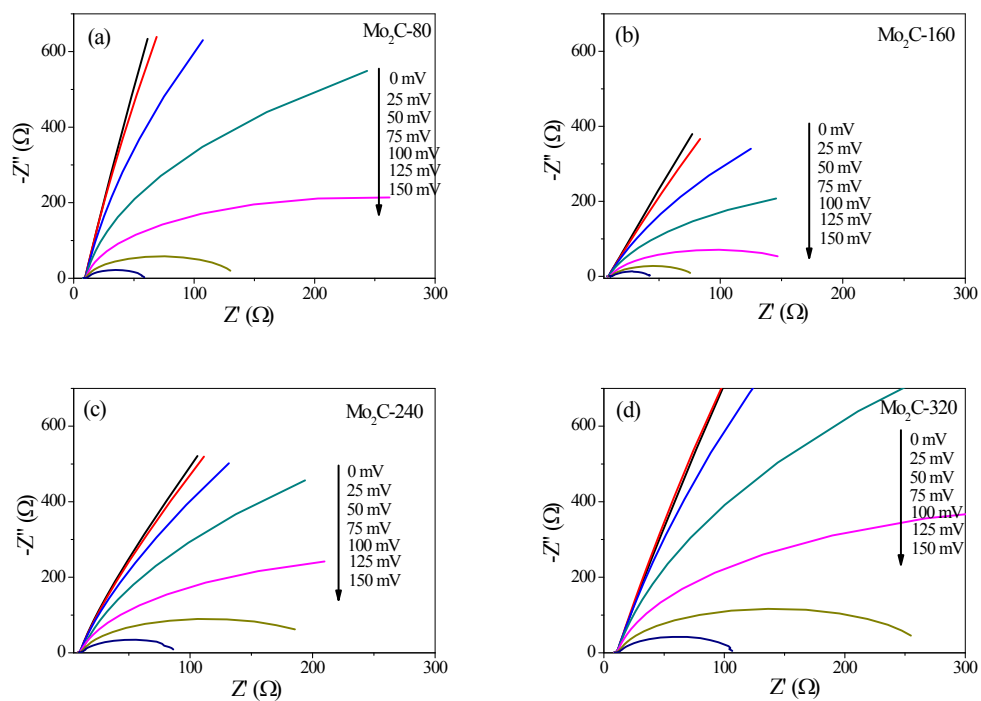

**Fig. S6** Electrochemical impedance spectroscopy (EIS) Nyquist plots of different Mo<sub>2</sub>C@NC electrocatalysts.



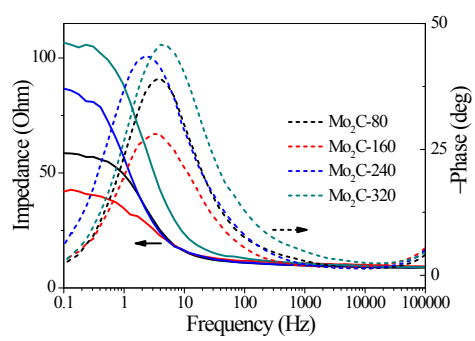

**Fig. S7** Comparison of bode plots for different Mo<sub>2</sub>C@NC electrocatalysts at  $\eta = 150$  mV.

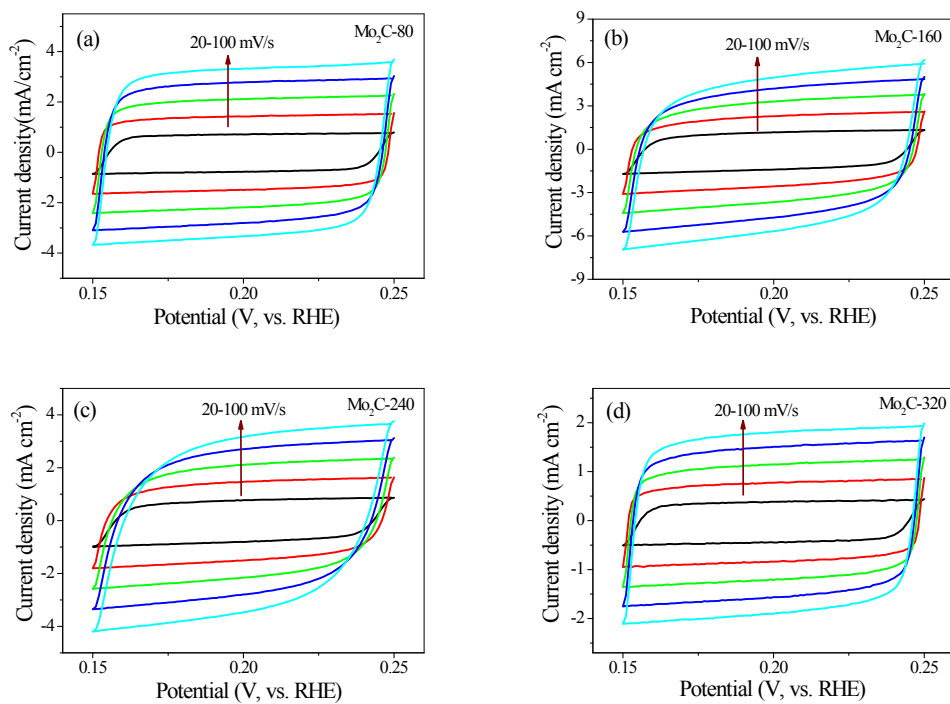

**Fig. S8** CVs performed at various scan rates of different  $\text{Mo}_2\text{C}@NC$  electrocatalysts.

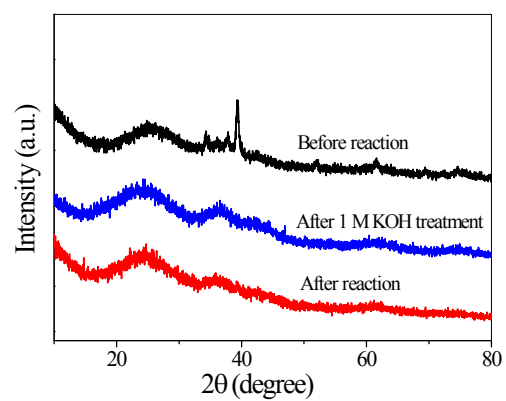

**Fig. S9** XRD patterns of Mo<sub>2</sub>C@NC-160 in different conditions.
